# Supplementary material for: Rebalance of mitophagy by inhibiting LRRK2 improves colon alterations in an MPTP in vivo model
Source: PubMed Central journal article supplement — iScience. 2024 Sep 16;27(10):110980. doi: 10.1016/j.isci.2024.110980 (PMC11615202; doi:10.1016/j.isci.2024.110980), 2024-09-16

iScience, Volume 27

## Supplemental information

**Rebalance of mitophagy by inhibiting LRRK2**

**improves colon alterations**

**in an MPTP *in vivo* model**

**Alessia Filippone, Deborah Mannino, Laura Cucinotta, Fabrizio Calapai, Lelio Crupi, Irene Paterniti, and Emanuela Esposito**



**Figure S1. Western blot analysis of p-Ser 935 in SHSY5Y cells, p-Rab12 and IHC of a-syn and DAT in brain tissue, related to Figure 1.**

A and A1) Western blot of phosphorylated LRRK2 at Serine 935; B and B1) Western blot of p-Rab 12; C to H) IHC of a-syn in brain tissues; I to N) IHC of DAT in brain tissues. One-way ANOVA test. \*\*\* $p < 0.001$  vs control; ## $p < 0.01$  vs MPTP; ### $p < 0.001$  vs MPTP.

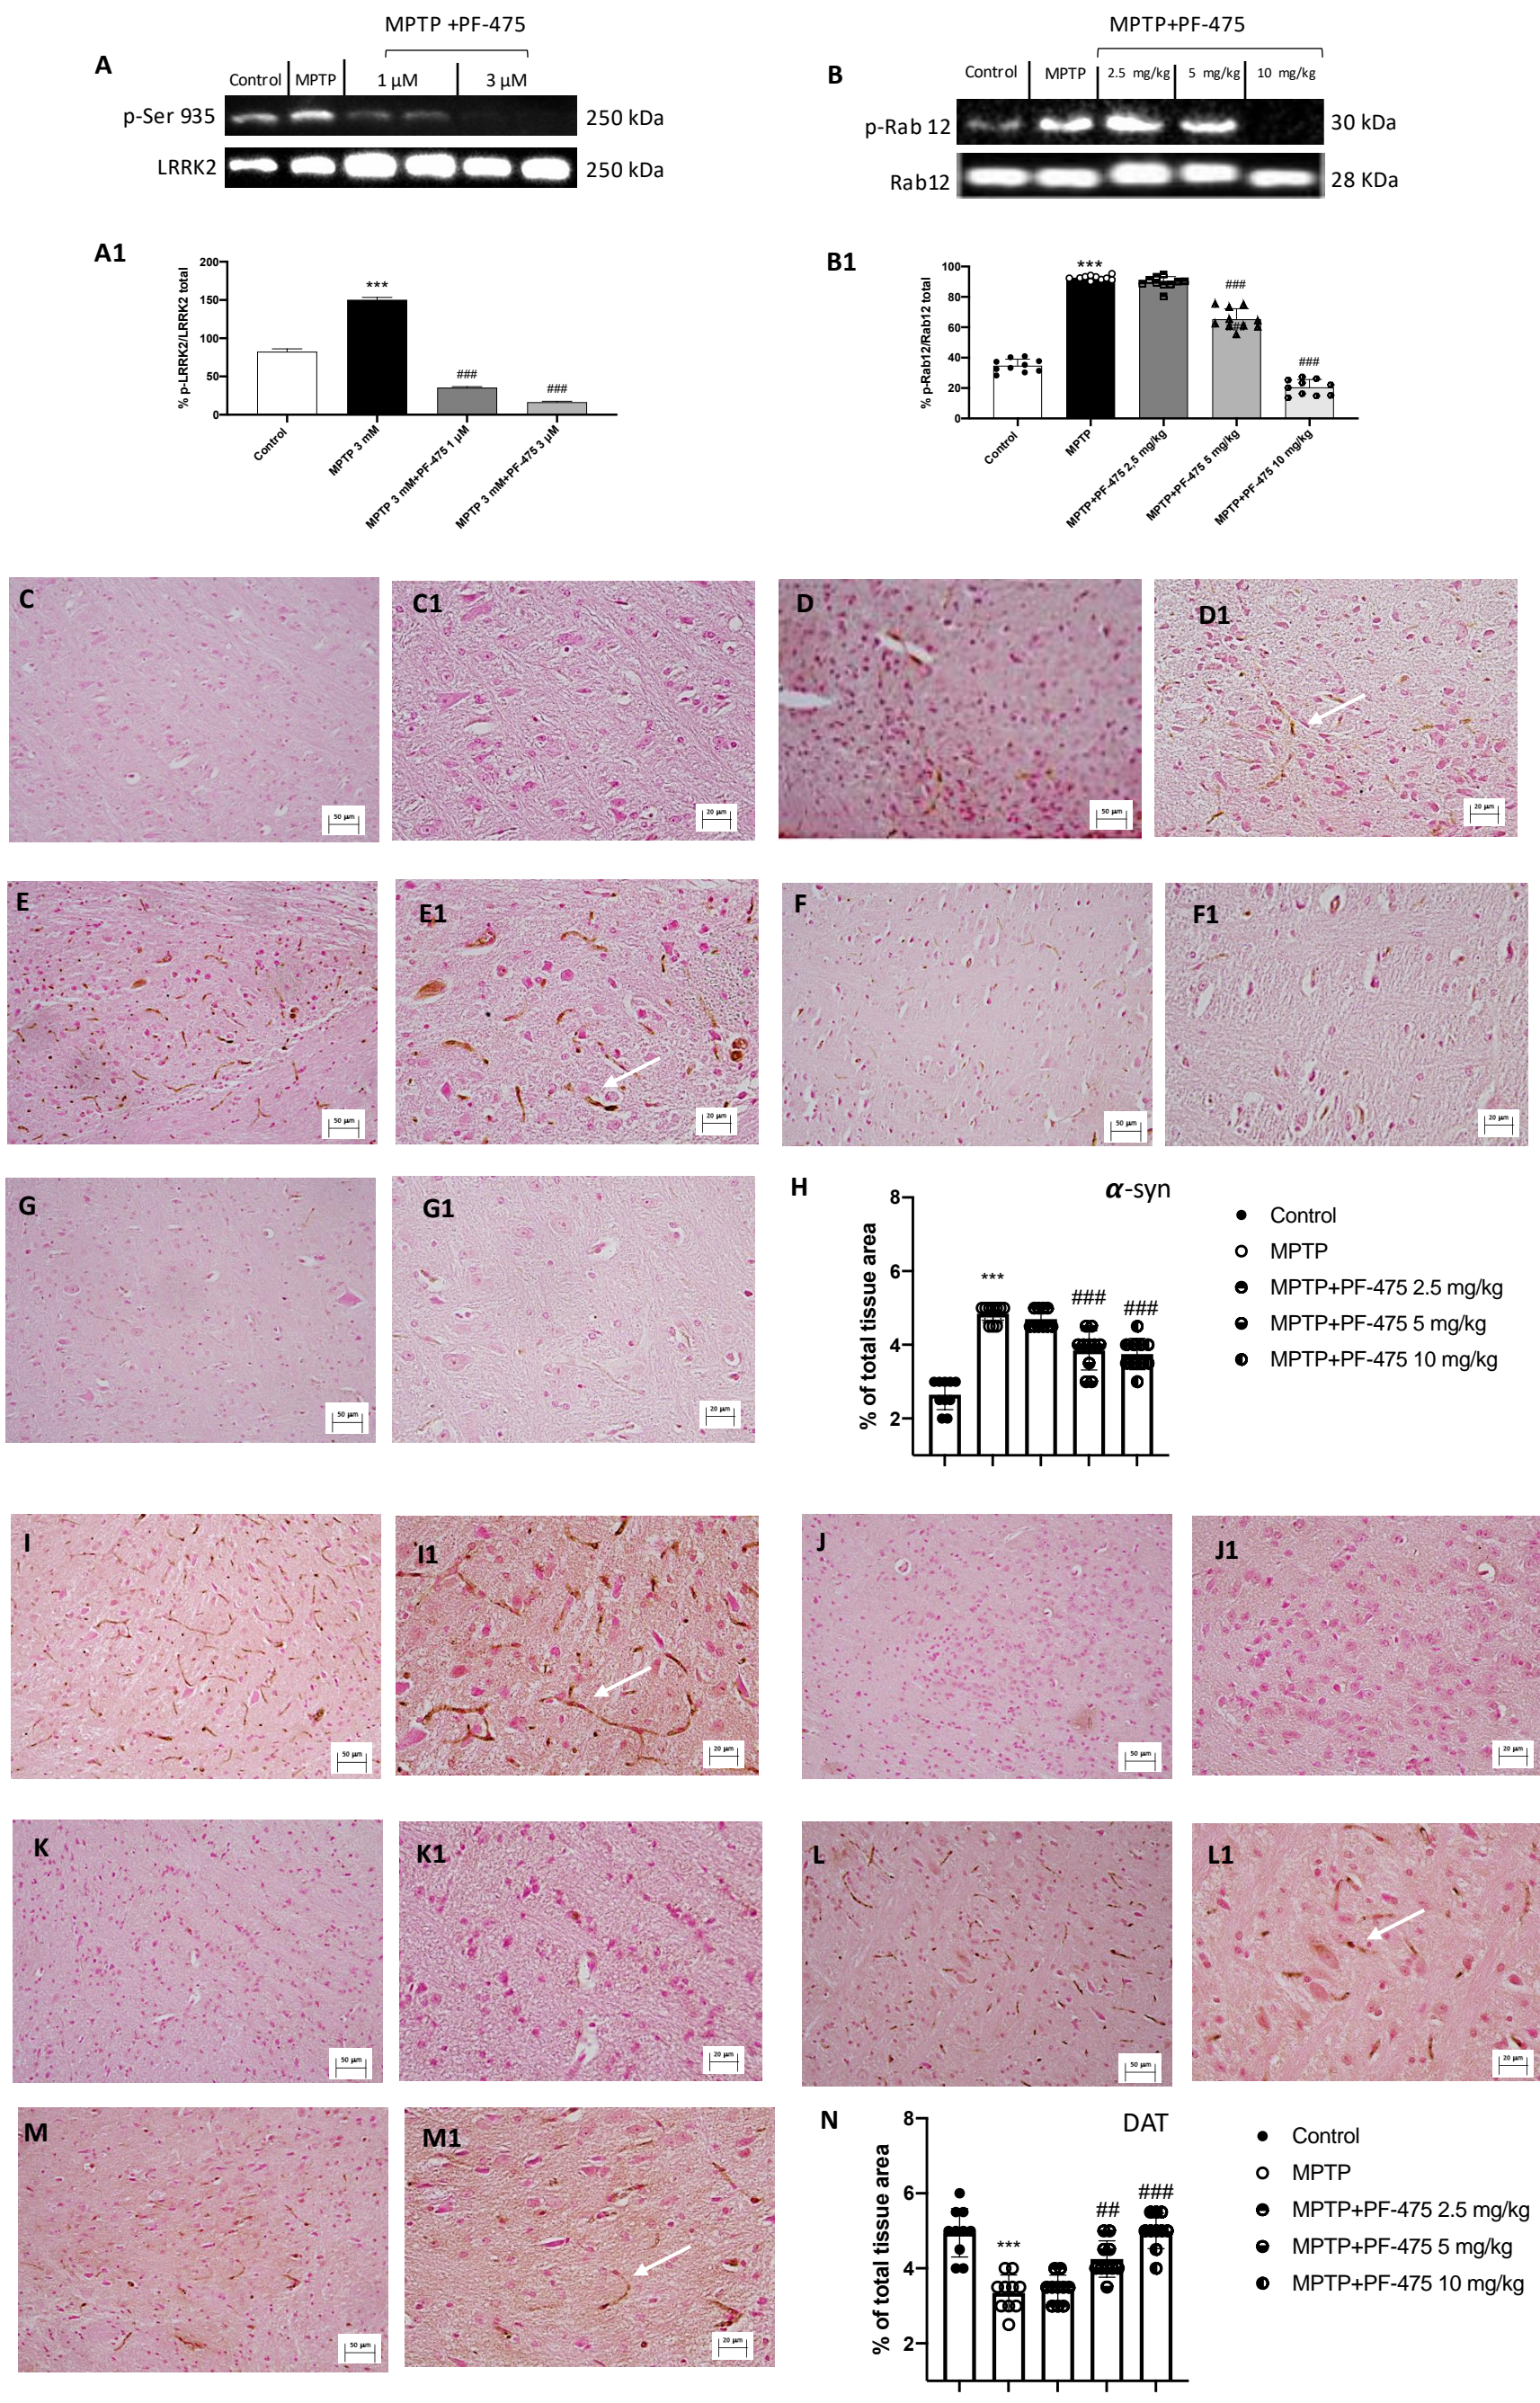



**Figure S2. Western blot analysis of p-Rab10, ZO-1 and occludin in colon tissue, related to Figure 4.**

A and A1) Western blot of p-Rab 10 in colon tissues; B and B1) Western blot of ZO-1 in colon tissues; C and C1) Western blot of Occludin in colon tissues. One-way ANOVA test. \*\*\*p < 0.001 vs control; ##p < 0.01 vs MPTP; ###p < 0.001 vs MPTP.

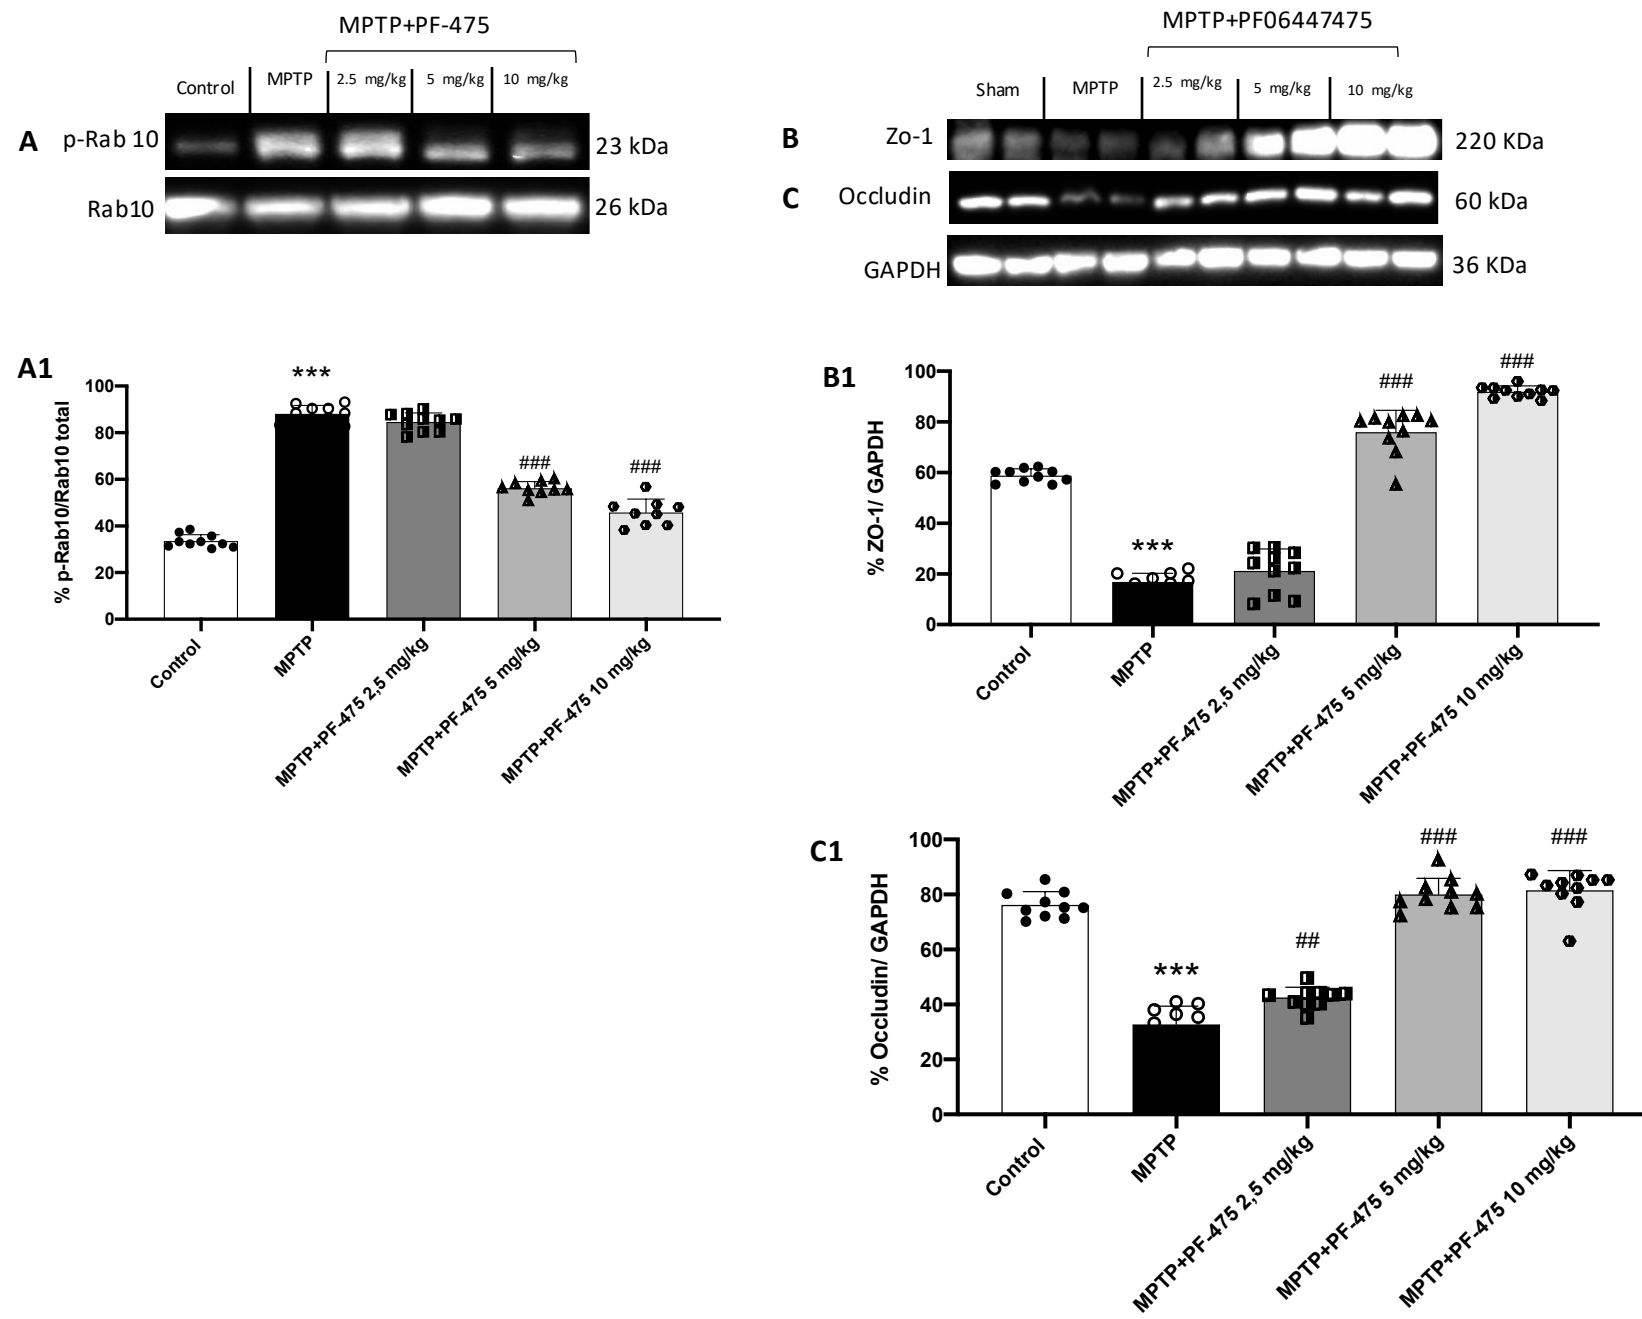

**Figure S3. Immunofluorescence analysis of LAMP2, related to Figure 2.**

A) Sham group; B) MPTP group; C) MPTP + PF-475 2.5 mg/kg; D) MPTP + PF-475 5 mg/kg; E) MPTP + PF-475 10 mg/kg; F) IHC graph.  
One-way ANOVA test. \*\*\*p < 0.001 vs control; ###p < 0.001 vs MPTP.

DAPI/LAMP2

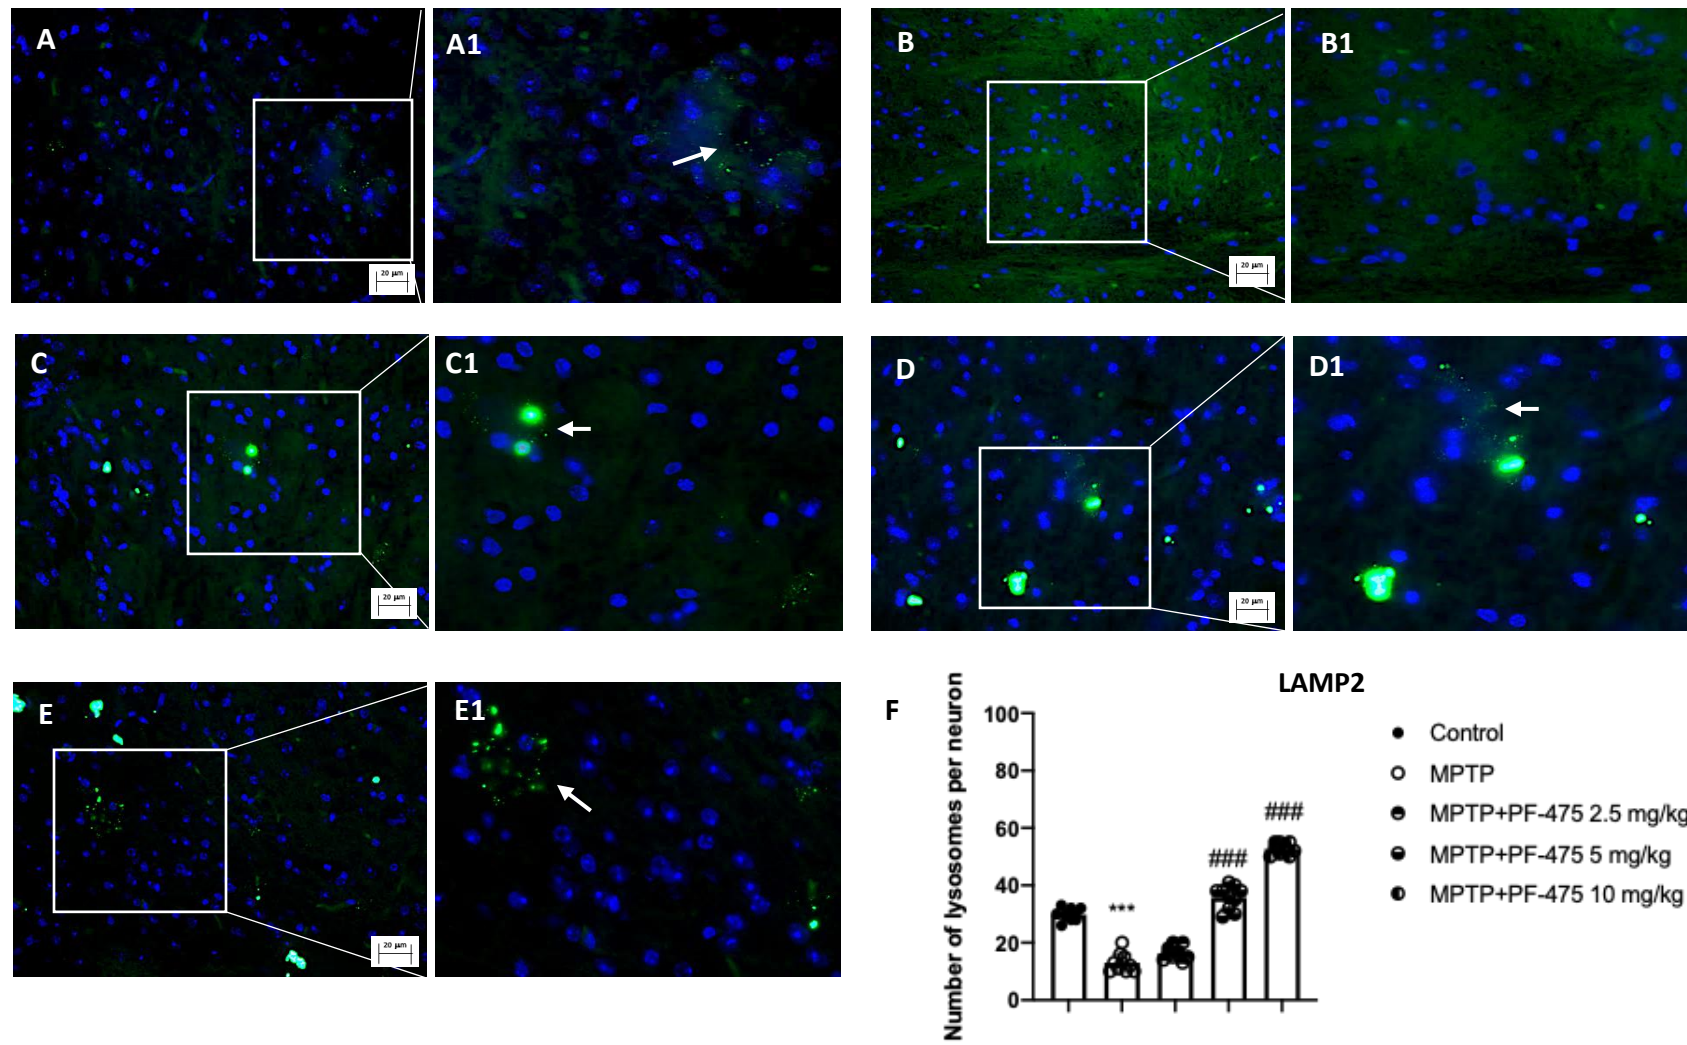

**Figure S4. MDA and ATP assay in brain and colon tissues, related to Figure 2.**

A) MDA assay and B) ATP assay in brain tissues; C) MDA assay and D) ATP assay in colon tissues.

One-way ANOVA test. \*\*\* $p < 0.001$  vs control; # $p < 0.05$  vs MPTP; ## $p < 0.01$  vs MPTP.

**A**

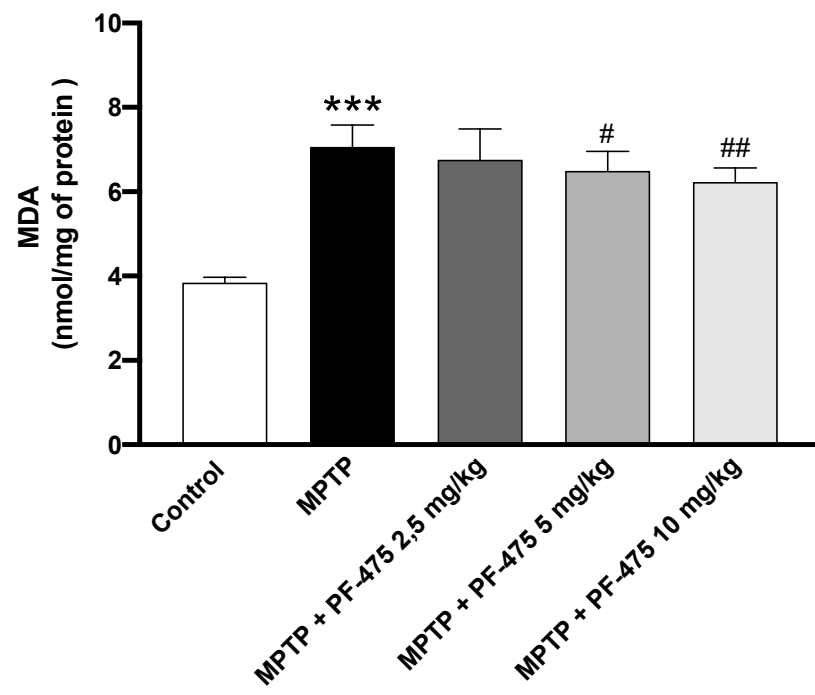

Brain

**B**

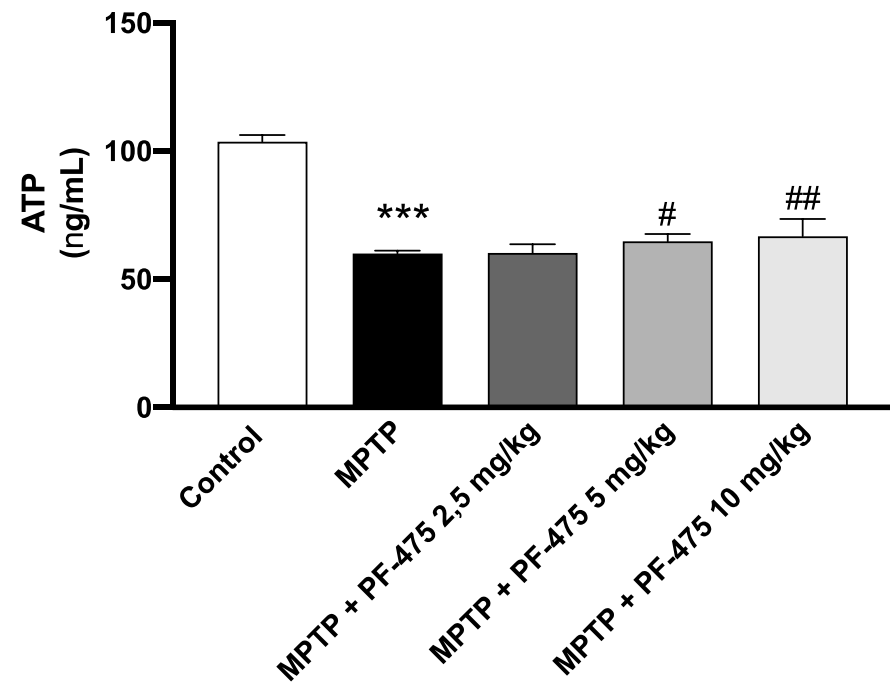

**C**

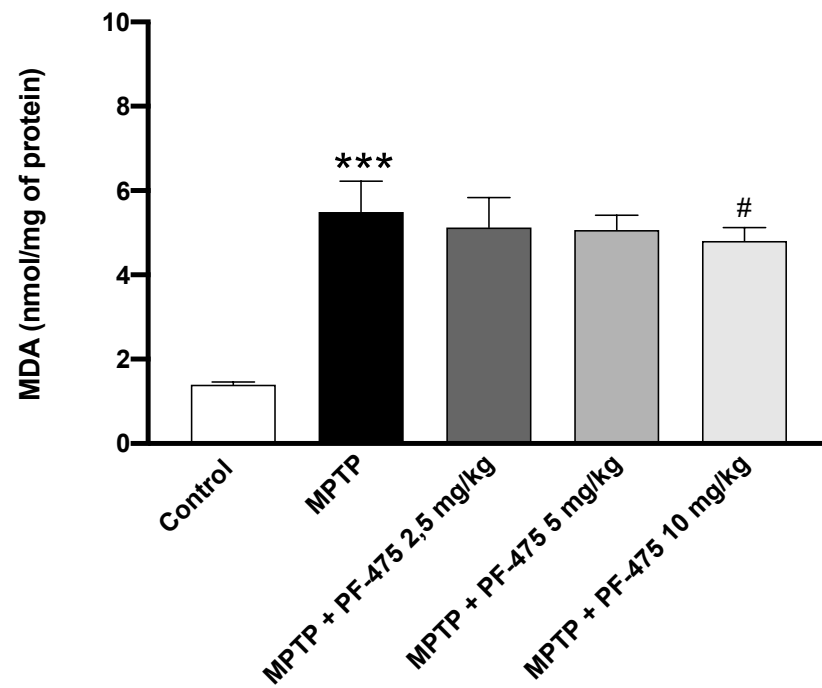

Colon

**D**

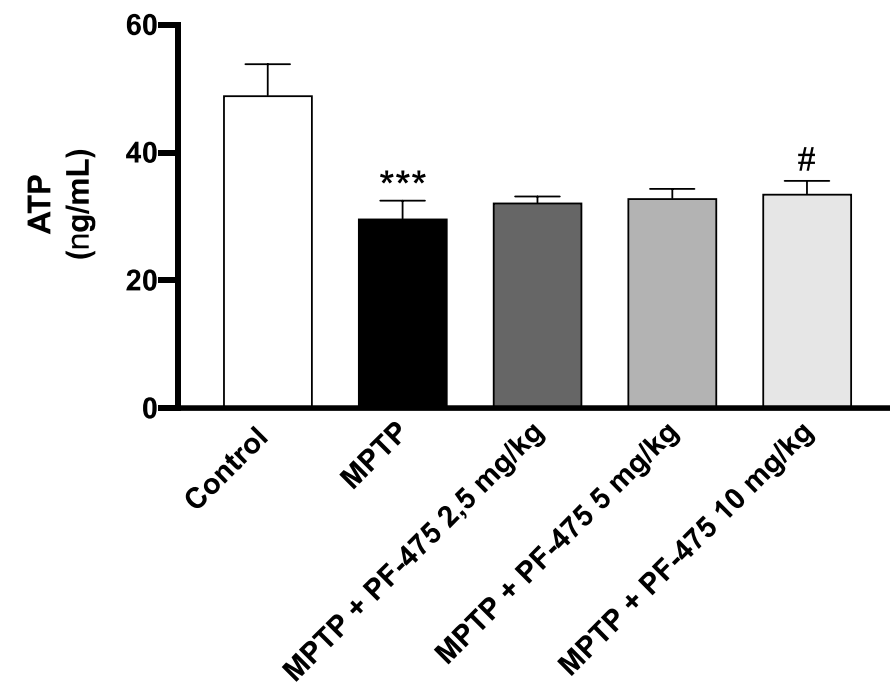

**Data S1. Original blots, related to Figure 1.**

Panel A) Original blot of p-Ser 935 and LRRK2 antibodies; Panels B and C) Original blot of  $\alpha$ -syn; Panel D) Original blot of GAPDH antibody.

**Panel A**

**p-Ser 935**

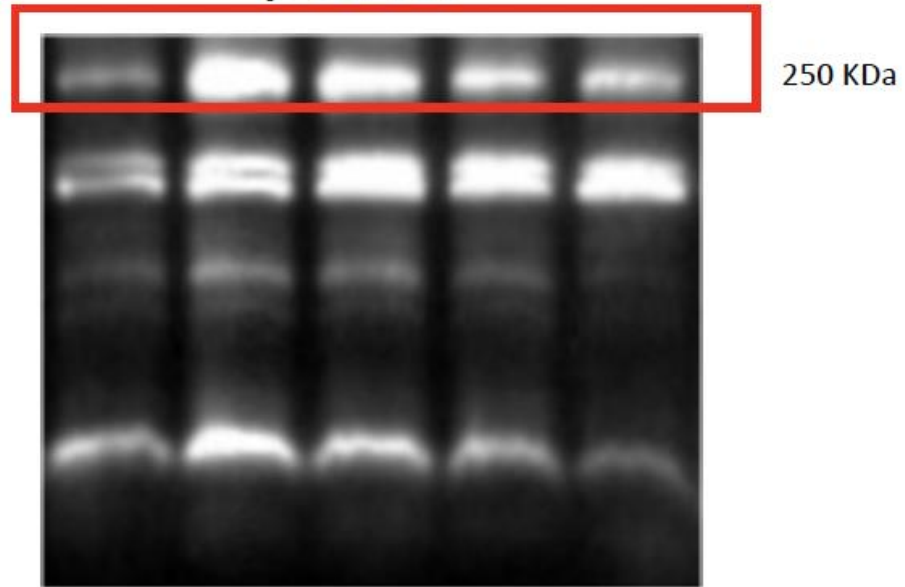

**Panel A**

**LRRK2**

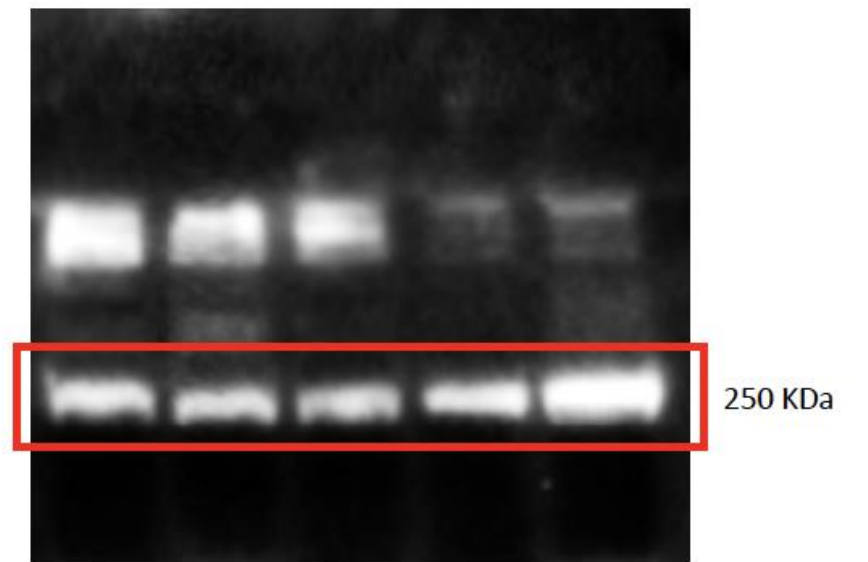

**Panels B and C**

**$\alpha$ -syn**

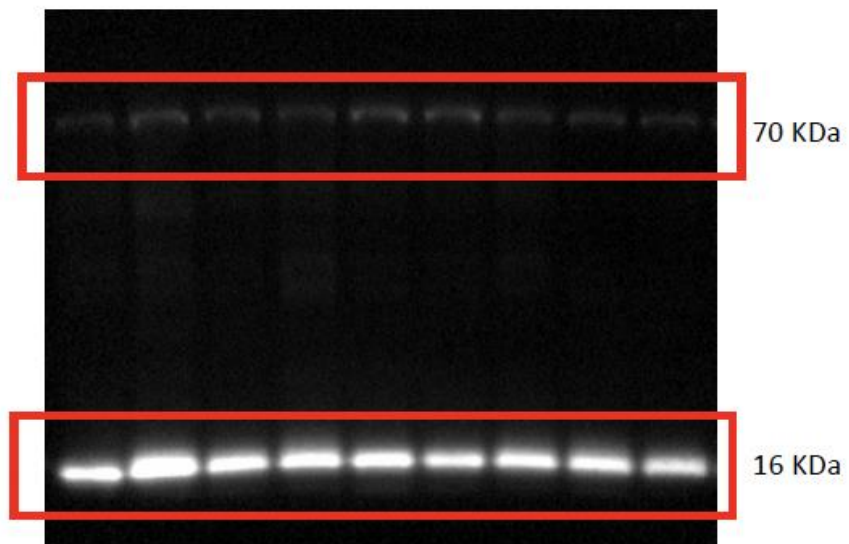

**Panel D**

**GAPDH**

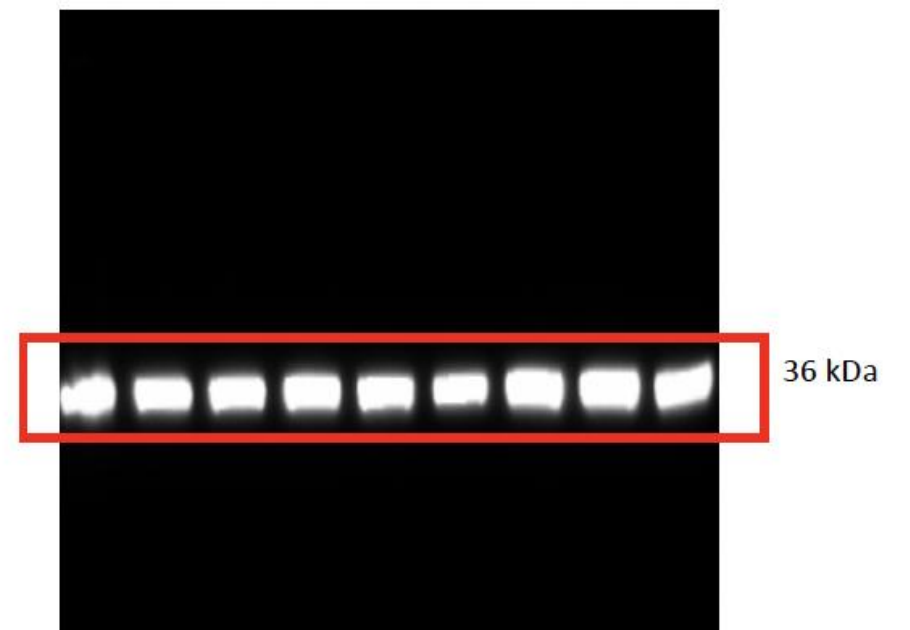

**Data S2. Original blots, related to Figure 2.**

Panel A) Original blot of OPTN antibody; Panel B) Original blot of LAMP; Panel C) Original blot of p-62 antibody; Panel D) Original blot of TNF- $\alpha$  antibody; Panel E) Original blot of GAPDH antibody.

Panel A

OPTN

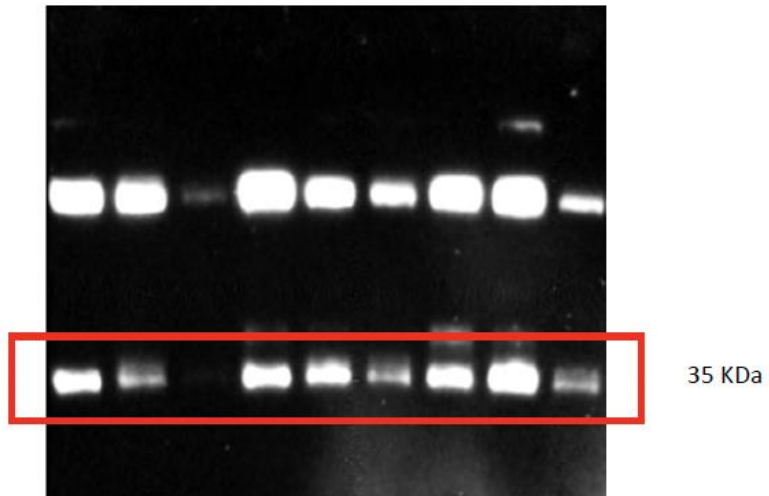

Panel B

LAMP

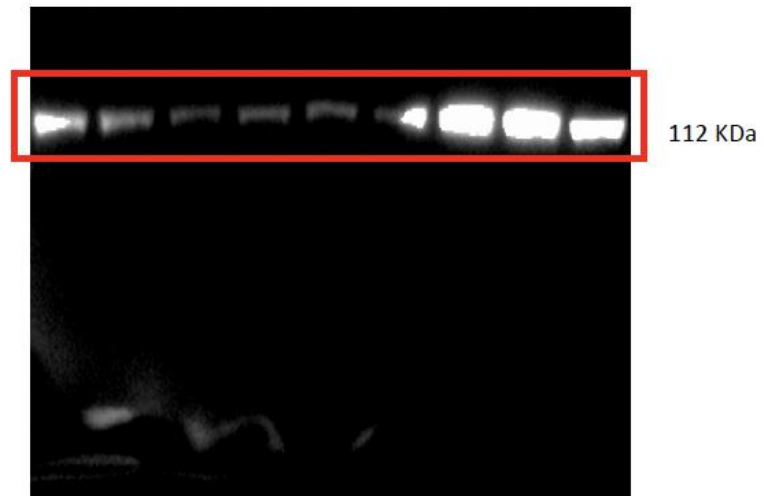

Panel C

p-62

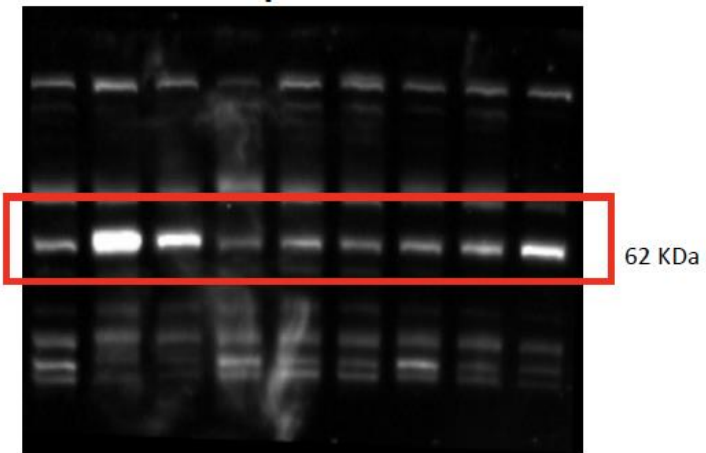

Panel D

TNF- $\alpha$

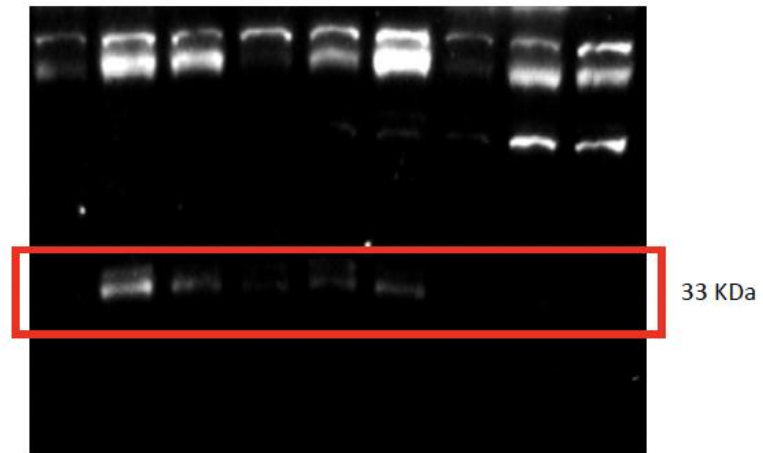

Panel E

GAPDH

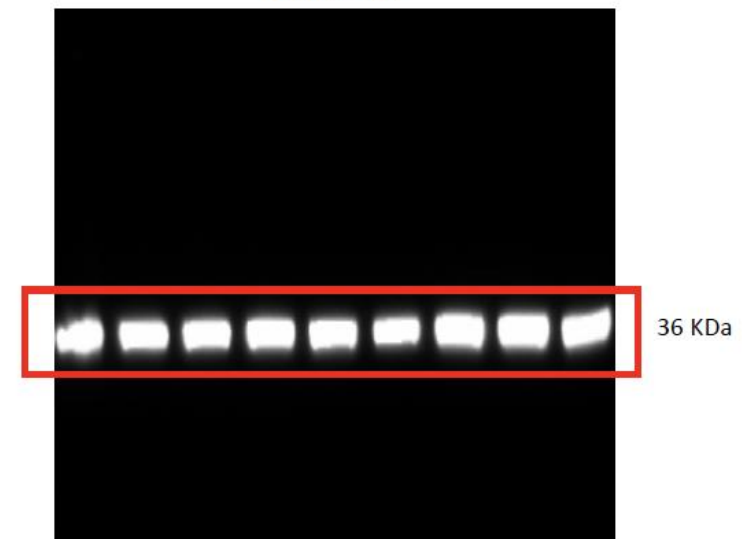

**Data S3. Original blots, related to Figure 3.**

Panel A) Original blot of p-Ser 935 antibody; Panel B) Original blot of LRRK2 antibody.

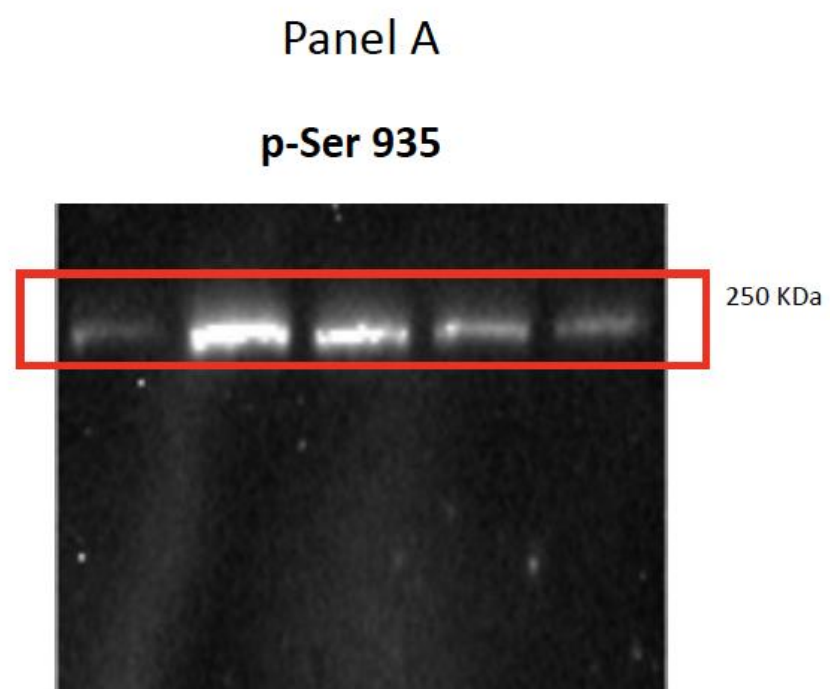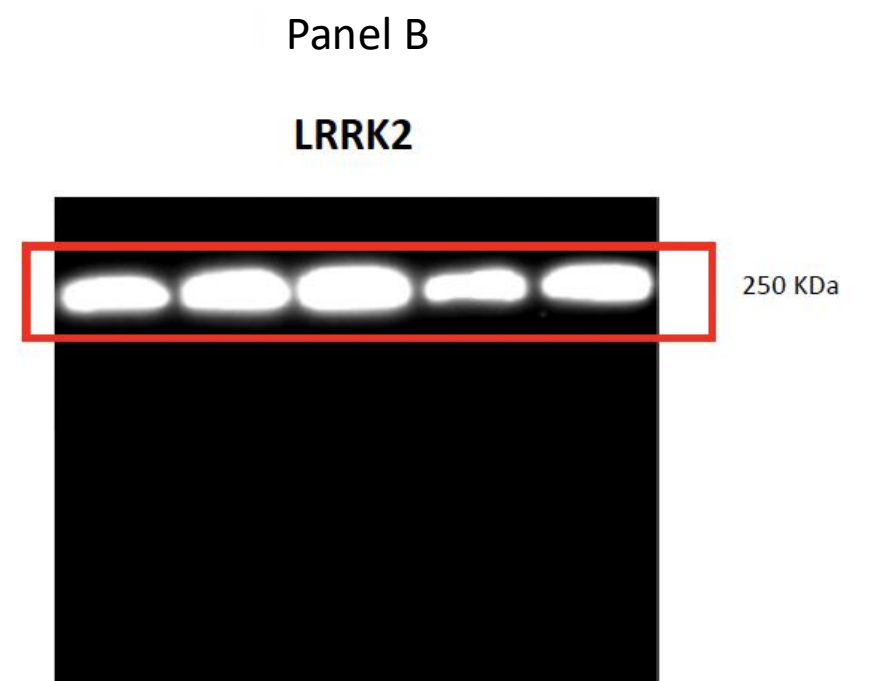



**Data S4. Original blots, related to Figure 4.**

Panel A) Original blot of COX-2 antibody; Panel B) Original blot of iNOS antibody; Panel C) Original blot of GAPDH antibody.

**Panel A**

**COX-2**

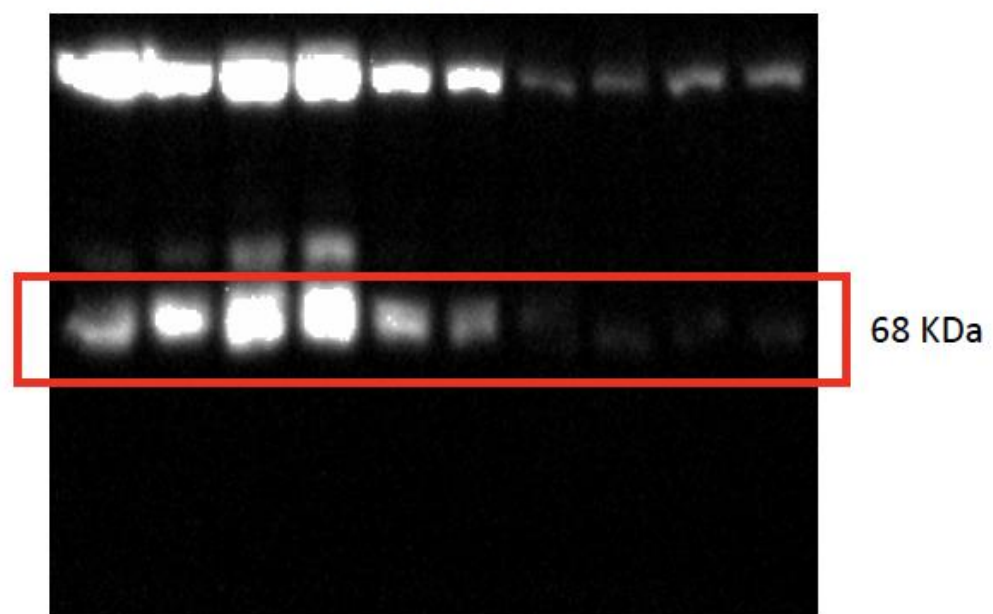

**Panel B**

**iNOS**

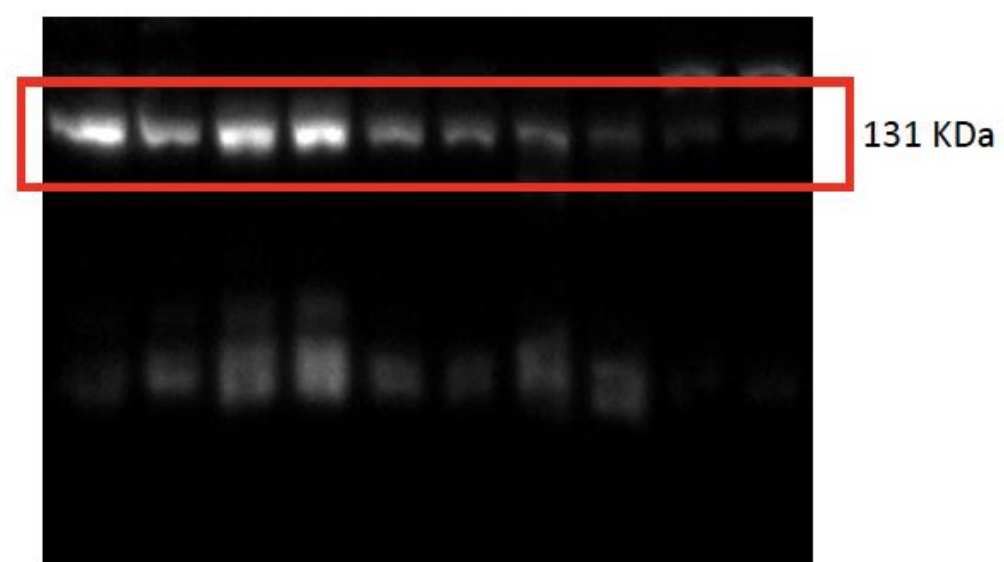

**Panel C**

**GAPDH**

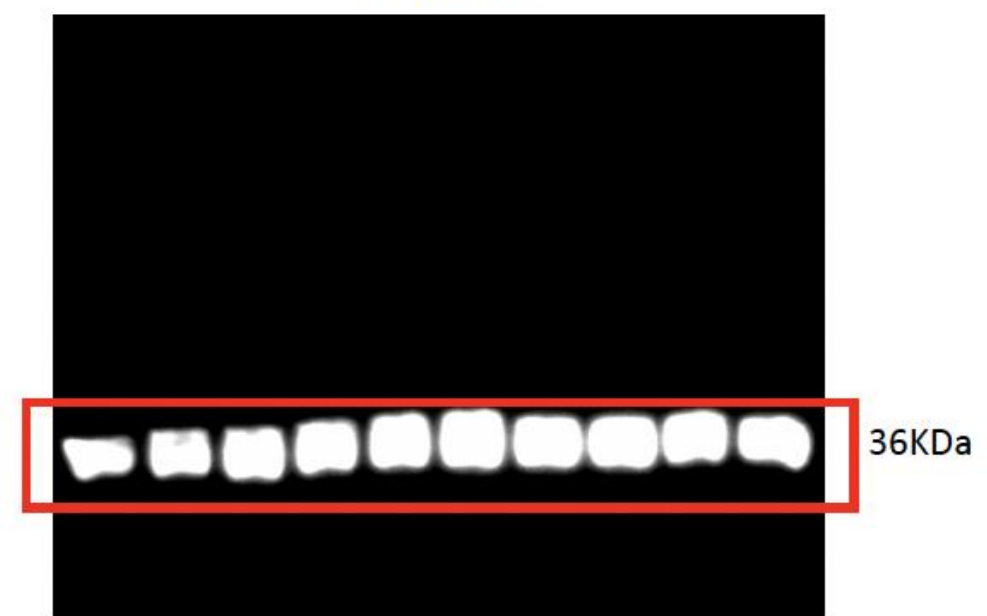

**Data S5. Original blots, related to Figure 6.**

Panel A) Original blot of  $\alpha$ -syn antibody; Panel B) Original blot of GAPDH antibody.

Panel A

$\alpha$ -syn

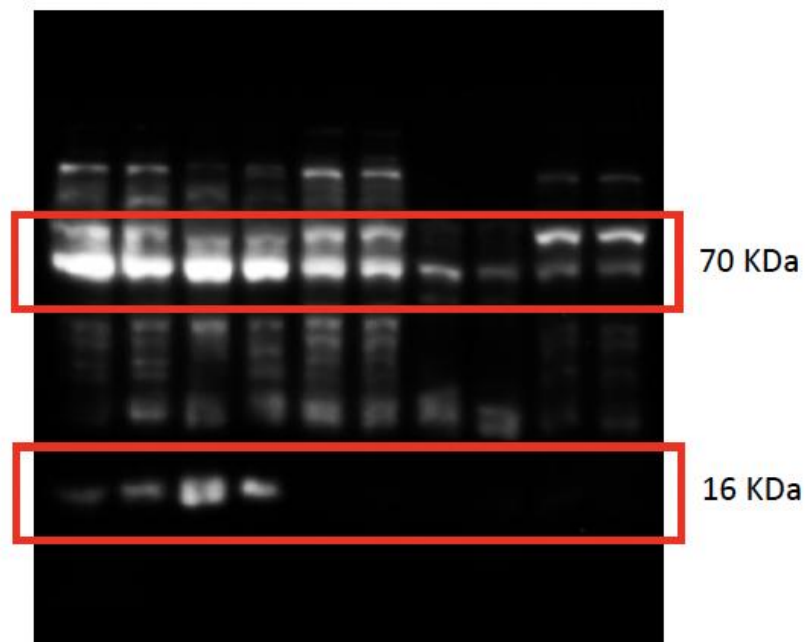

Panel B

GAPDH

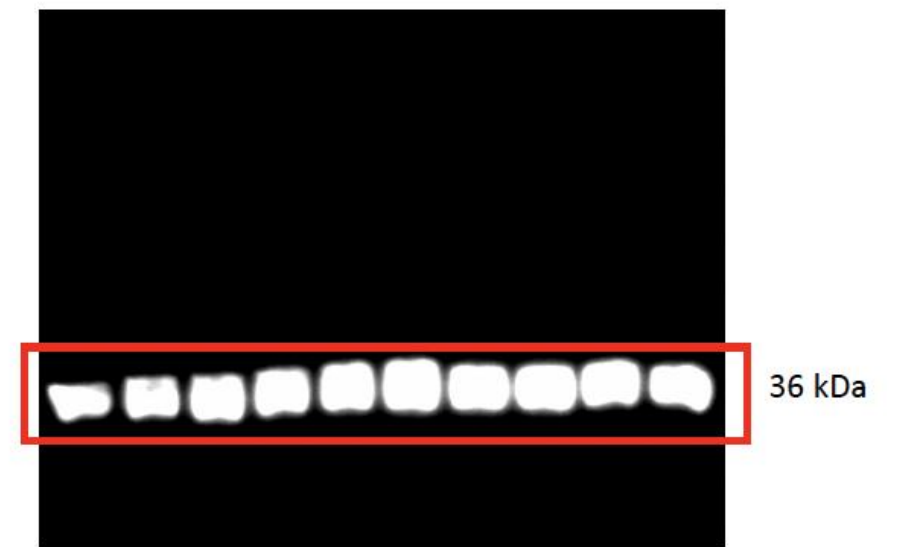

**Data S6. Original blots, related to Figure 6.**

Panel A) Original blot of PGP 9.5 antibody; Panel B) Original blot of NSE antibody, Panel C) Original blot of GAPDH antibody.

Panel A **PGP9.5**

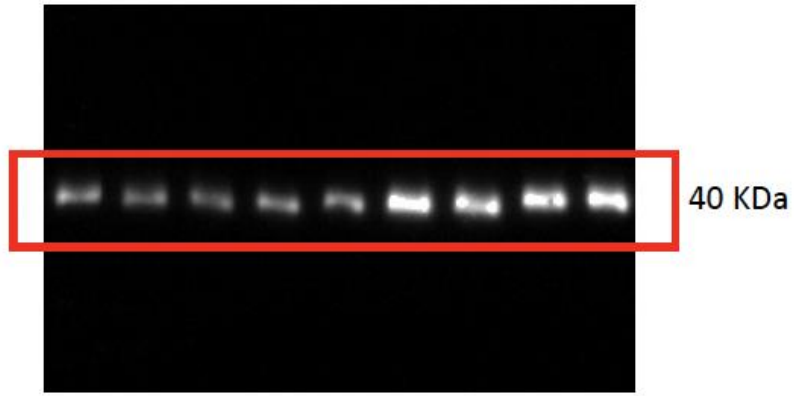

Panel B

**NSE**

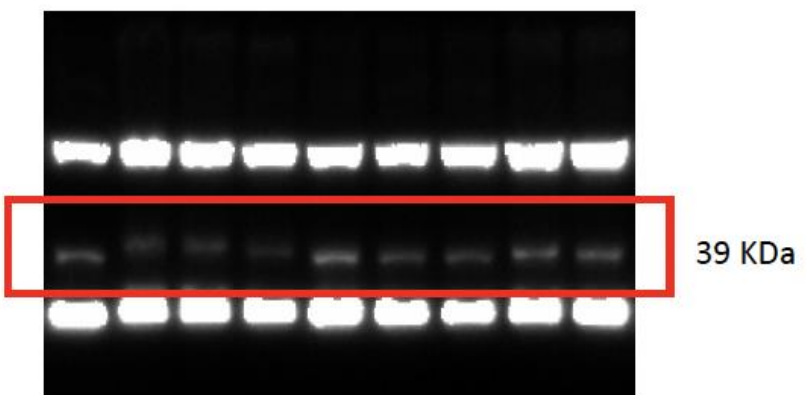

Panel C

**GAPDH**

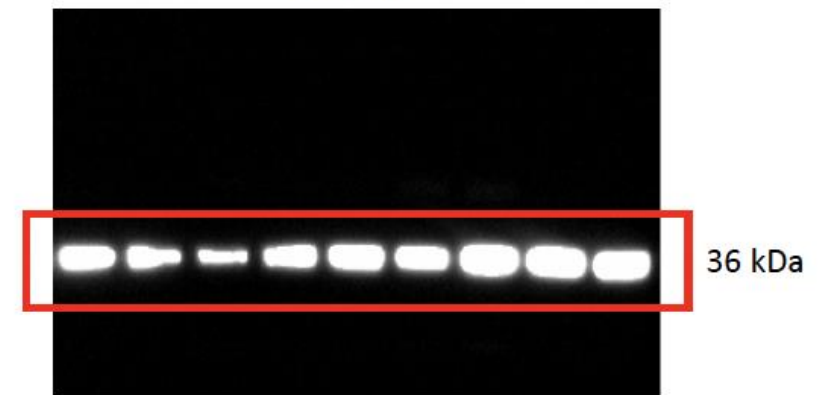



**Data S7. Original blots, related to Figure 7.**

Panel A) Original blot of OPTN antibody; Panel B) Original blot of LAMP2 antibody, Panel C) Original blot of p-62 antibody; Panel D) Original blot of TNF- $\alpha$  antibody; Panel E) Original blot of GAPDH.

Panel A

OPTN

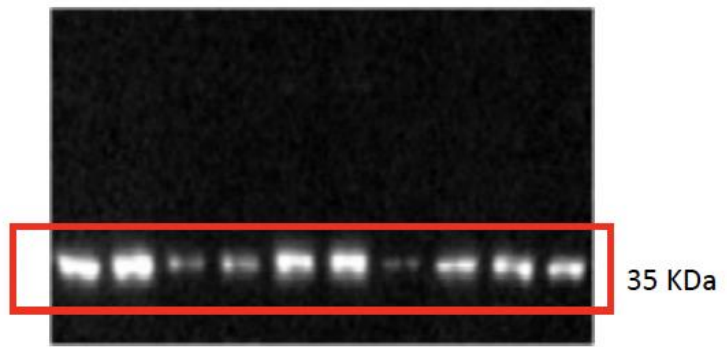

Panel B

LAMP2

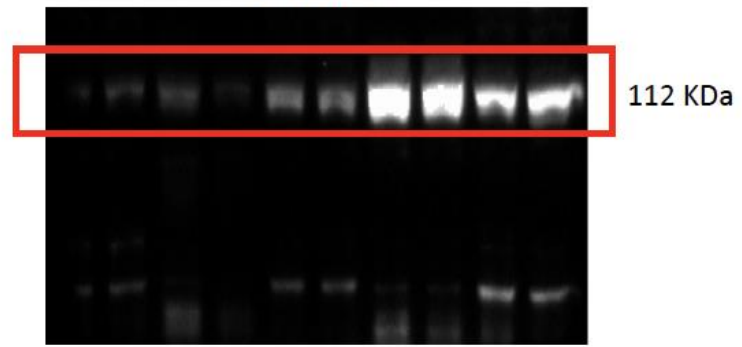

Panel C

p-62

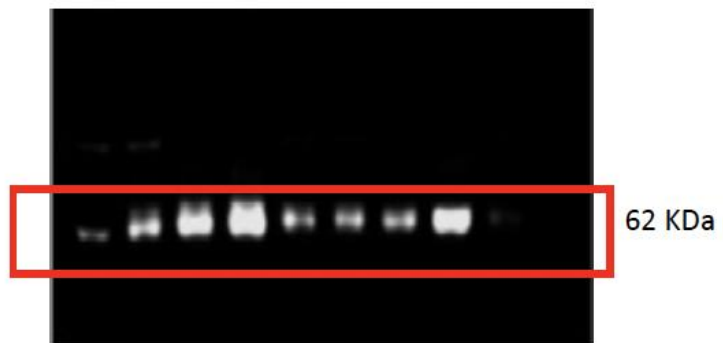

Panel D

TNF- $\alpha$

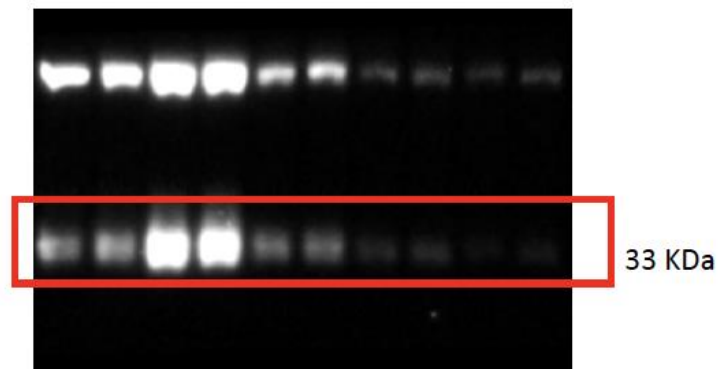

Panel E

GAPDH

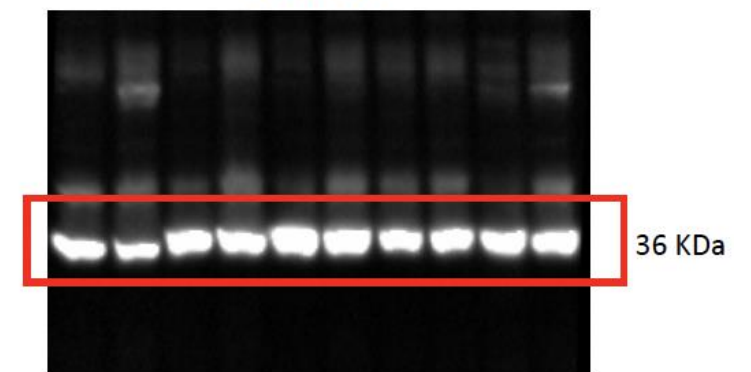

**Data S8. Original blots, related to Supplementary Figure S1.**  
Panel A) Original blots of p-Ser 935 and LRRK2 antibodies.

Panel A

p-Ser 935

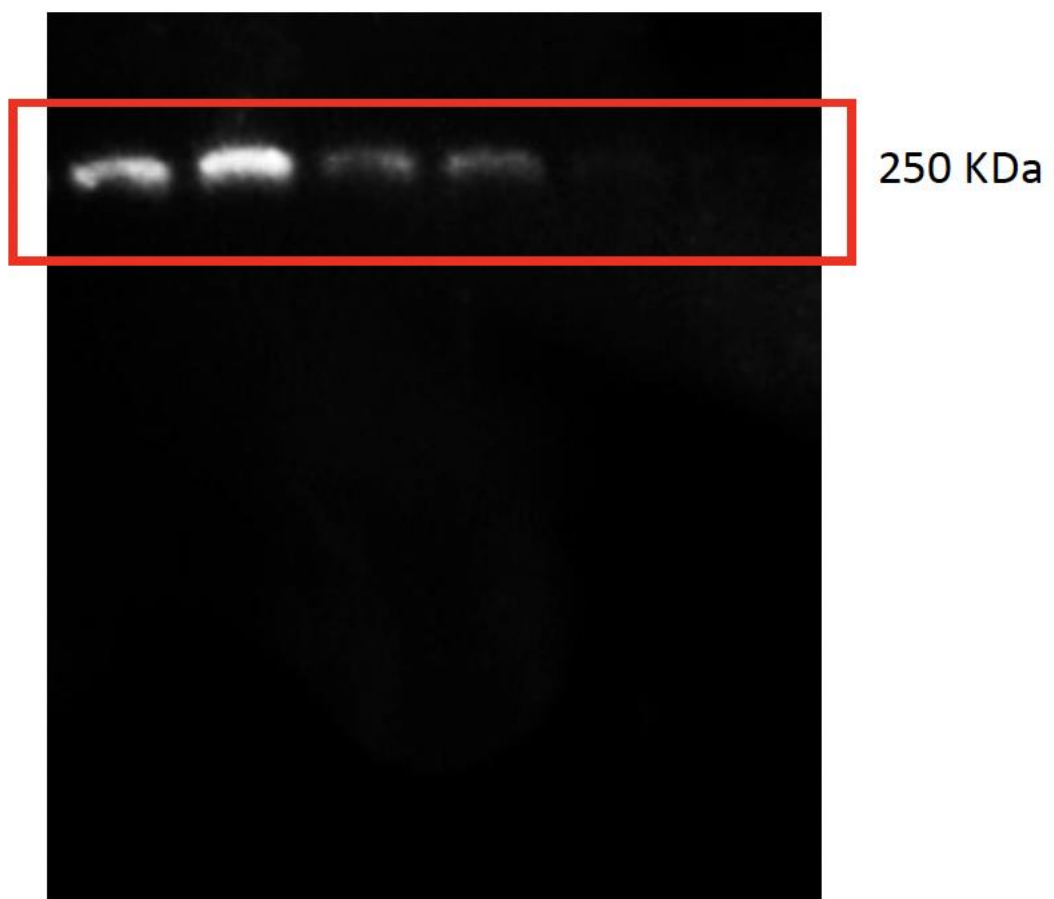

LRRK2

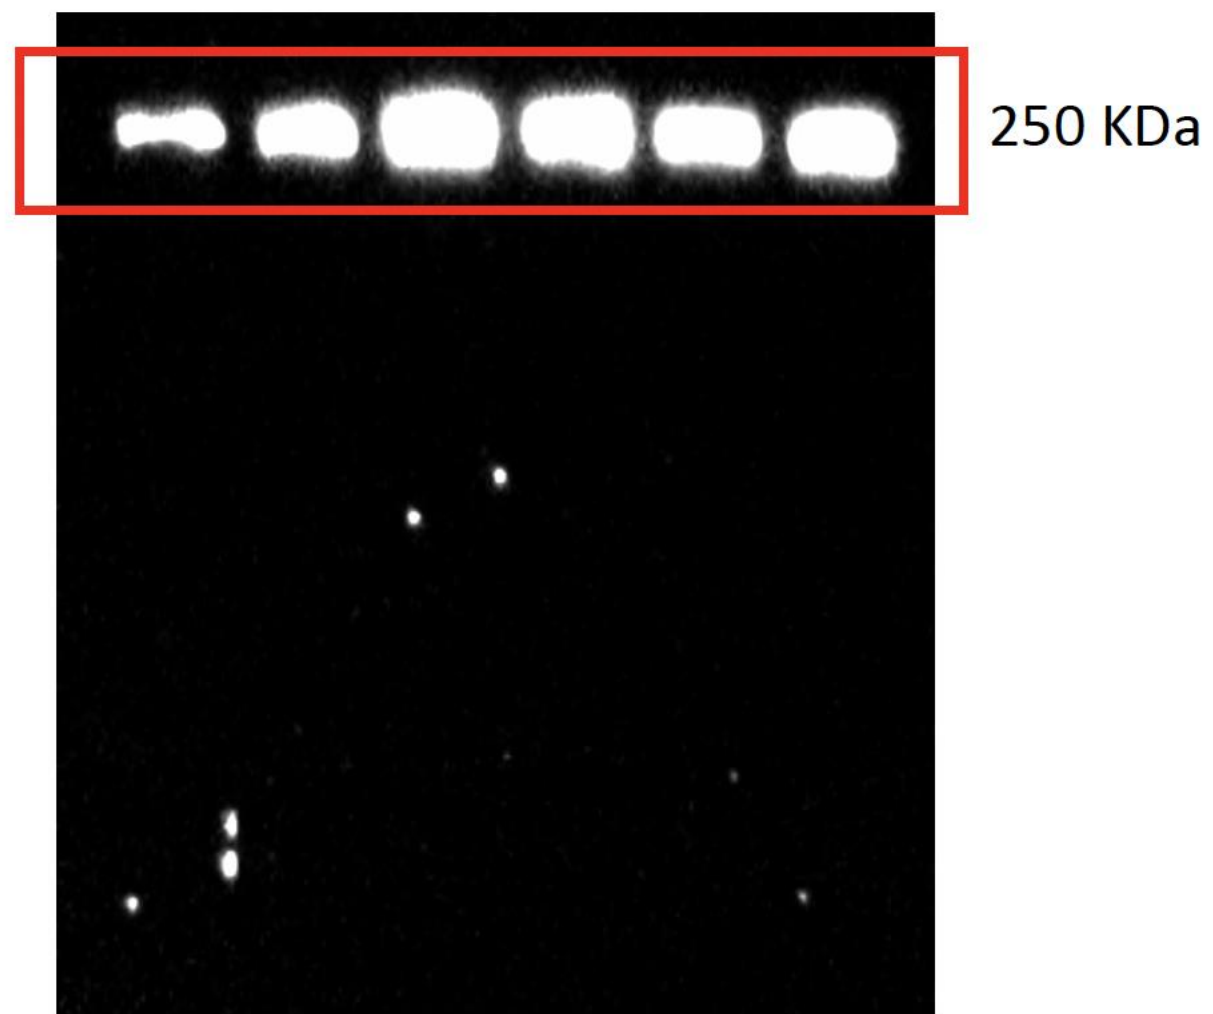

**Data S9. Original blots, related to Supplementary Figure S1.**  
Panel B) Original blot of p-Rab and Rab 12 antibodies.

Panel B

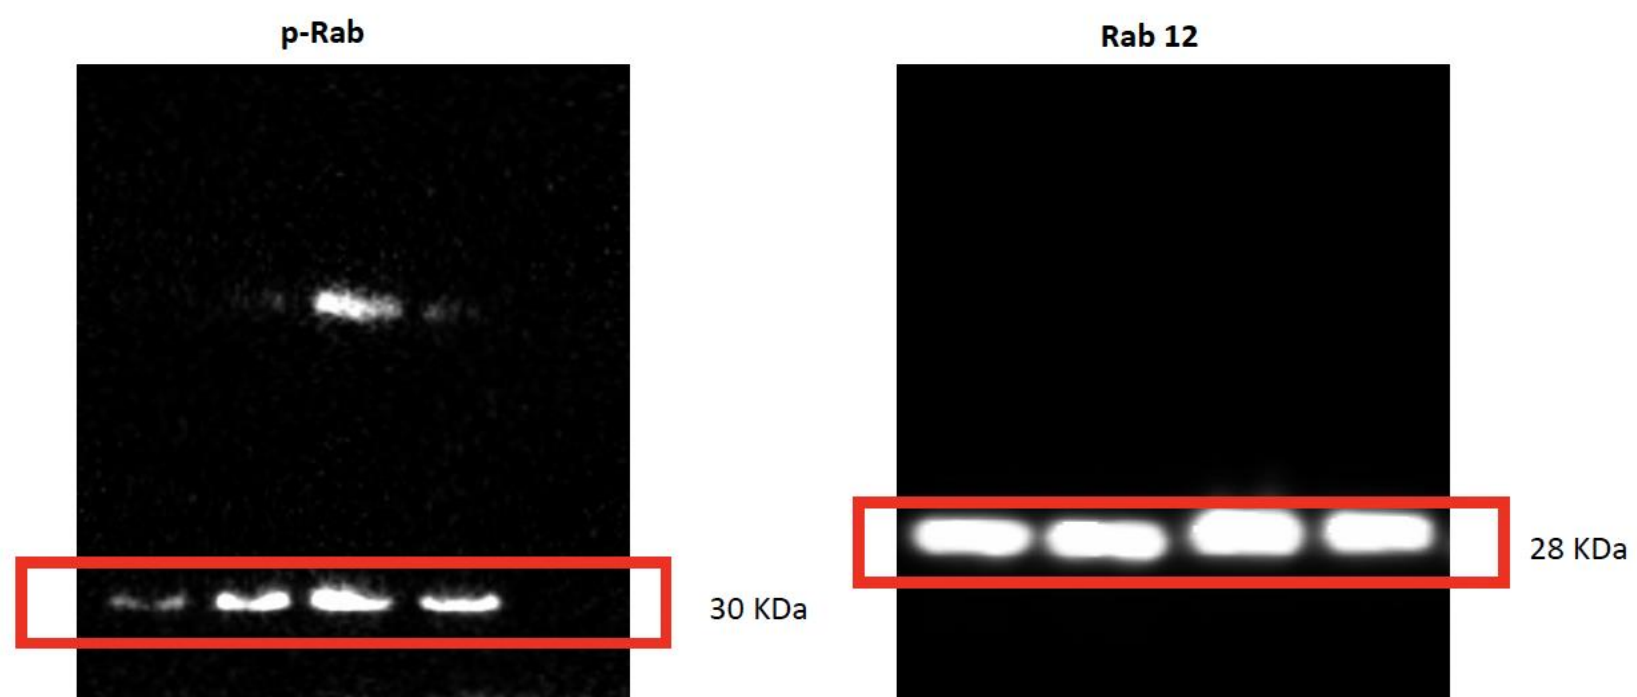



**Data S10. Original blots, related to Supplementary Figure S2.**

Panel A) Original blot of p-Rab and Rab 10 antibodies.

Panel A

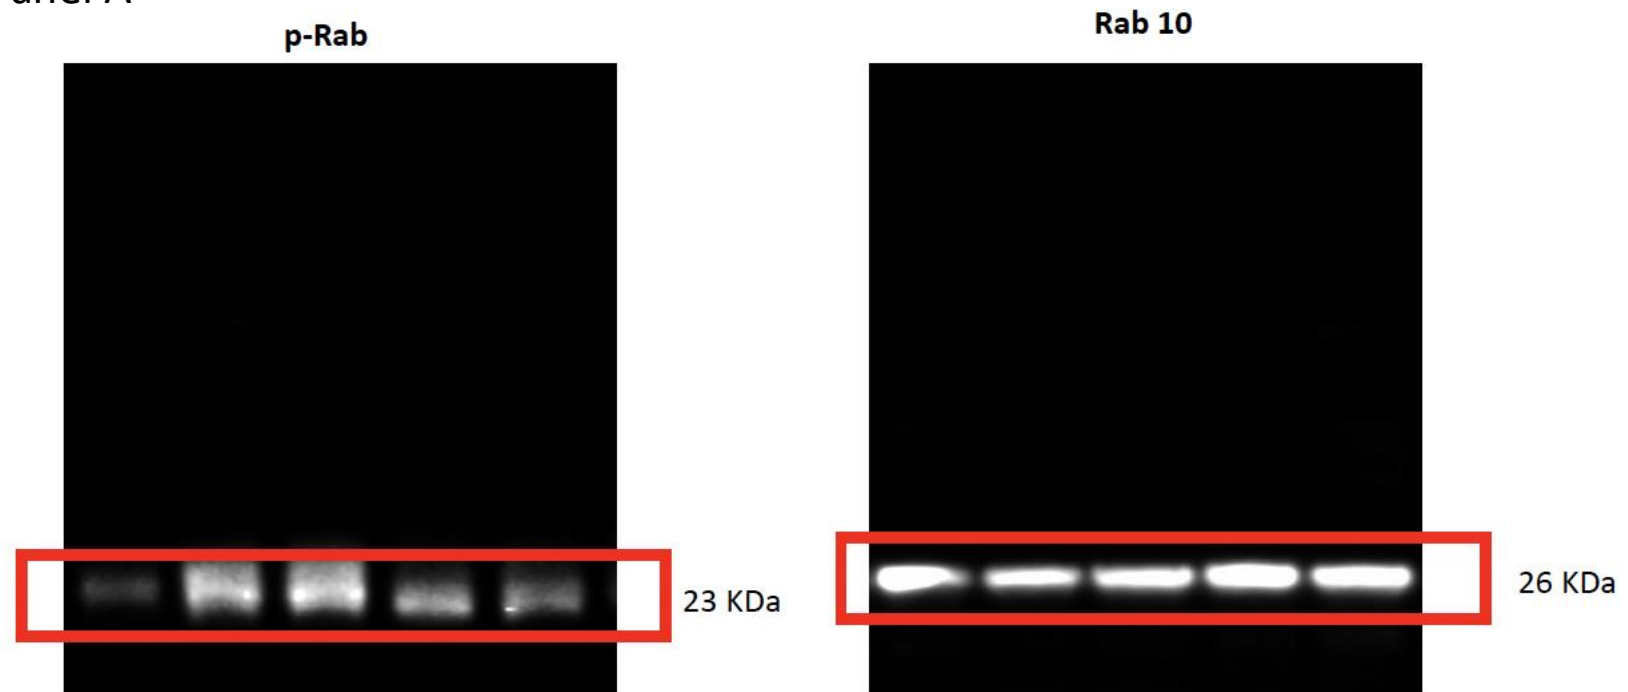

**Data S11. Original blots, related to Supplementary Figure S2.**

Panel B) Original blot of ZO-1 antibody; Panel C) Original blot of Occludin antibody.

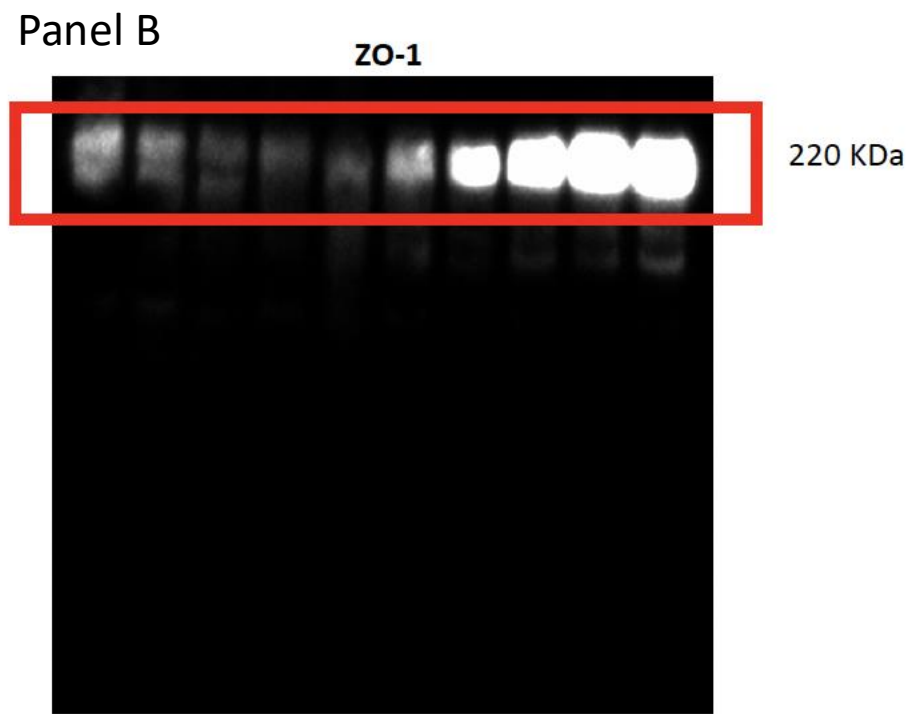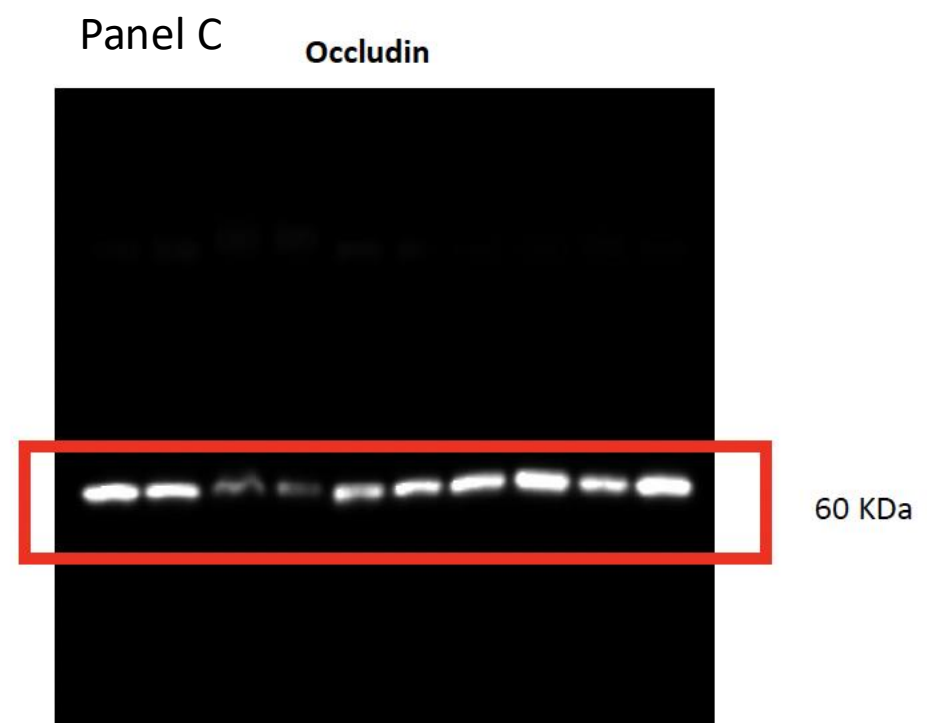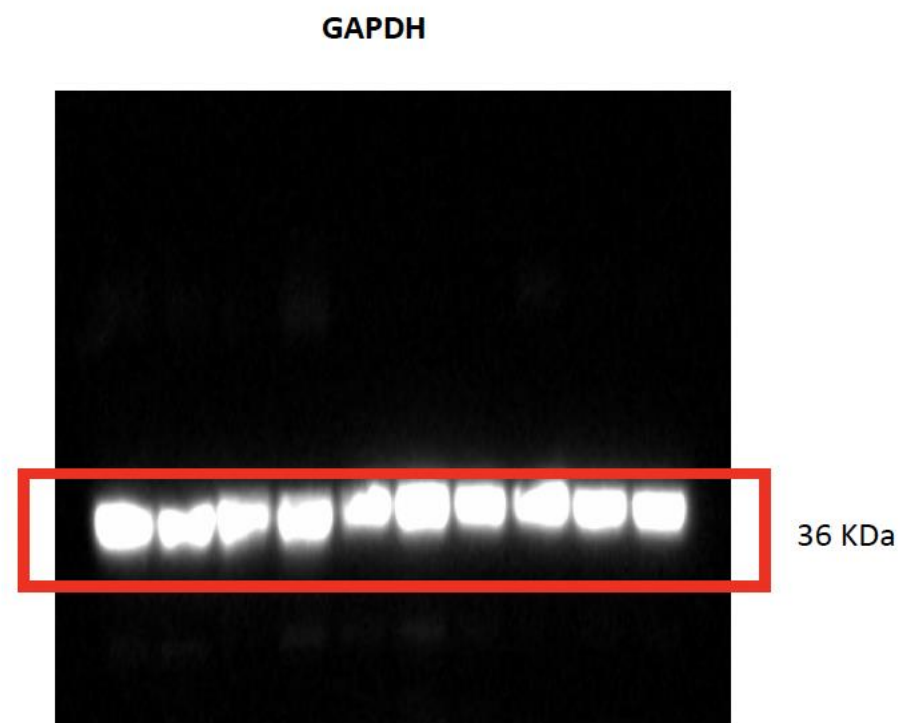

Supplement: mmc1.pdf [file mmc1.pdf]
